# Supplementary material for: Inequalities in sub-Saharan African women’s and girls’ health opportunities and outcomes: evidence from the Demographic and Health Surveys
Source: PubMed Central journal article supplement (PMC6326483; doi:10.7189/jogh.09.010410), 2019-06
Supplement: jogh-09-010410-s001.pdf [file jogh-09-010410-s001.pdf]

**Table S1. Country data**

| Country              | UN Region | Survey year <sup>1</sup> | Language <sup>1</sup> (A/F) | Economy <sup>2</sup> | IMR <sup>2</sup> | MMR <sup>2</sup> | Population of women 15-49 <sup>2</sup> | HIV prevalence <sup>2</sup> | IPTp (2 or 3 doses) policy since <sup>3</sup> | Indicators not available in the DHS survey of the particular country and year <sup>1</sup> |
|----------------------|-----------|--------------------------|-----------------------------|----------------------|------------------|------------------|----------------------------------------|-----------------------------|-----------------------------------------------|--------------------------------------------------------------------------------------------|
| <i>Benin</i>         | Western   | 2011-2012                | F                           | LIC                  | 70               | 436              | 2,311,289                              | 1.2                         | 2005                                          | -                                                                                          |
| <i>Burkina Faso</i>  | Western   | 2010                     | F                           | LIC                  | 70               | 417              | 3,579,459                              | 1.1                         | 2005                                          | -                                                                                          |
| <i>Burundi</i>       | Eastern   | 2010                     | F                           | LIC                  | 64               | 808              | 2,187,036                              | 1.6                         | -                                             | -                                                                                          |
| <i>Cameroon</i>      | Middle    | 2011                     | F                           | LMIC                 | 64               | 652              | 4,978,935                              | 5                           | 2004                                          | -                                                                                          |
| <i>Comoros</i>       | Eastern   | 2012                     | F                           | LIC                  | 60               | 365              | 178,949                                | -                           | 2003                                          | Not having anaemia                                                                         |
| <i>Congo</i>         | Middle    | 2011-2012                | F                           | LMIC                 | 40               | 494              | 979,629                                | 3.1                         | 2006                                          | -                                                                                          |
| <i>Congo DR</i>      | Middle    | 2013-2014                | F                           | LIC                  | 78               | 746              | 16,167,171                             | 1.1                         | 2004                                          | -                                                                                          |
| <i>Cote d'Ivoire</i> | Western   | 2011-2012                | F                           | LMIC                 | 75               | 715              | 4,701,945                              | 3.8                         | 2005                                          | -                                                                                          |
| <i>Ethiopia</i>      | Eastern   | 2011                     | -                           | LIC                  | 48               | 482              | 20,811,496                             | 1.3                         | -                                             | Malaria prophylaxis during pregnancy                                                       |
| <i>Gabon</i>         | Middle    | 2012                     | F                           | UMIC                 | 40               | 314              | 387,504                                | 4.3                         | 2003                                          | -                                                                                          |
| <i>The Gambia</i>    | Western   | 2013                     | A                           | LIC                  | 49               | 730              | 439,525                                | 1.9                         | 2003                                          | -                                                                                          |
| <i>Ghana</i>         | Western   | 2014                     | A                           | LMIC                 | 44               | 322              | 6,803,551                              | 1.5                         | 2003                                          | -                                                                                          |
| <i>Guinea</i>        | Western   | 2012                     | F                           | LIC                  | 67               | 695              | 2,678,217                              | 1.6                         | 2005                                          | -                                                                                          |
| <i>Kenya</i>         | Eastern   | 2014                     | A                           | LMIC                 | 37               | 525              | 10,853,576                             | 5.3                         | 1999                                          | Not having anaemia                                                                         |
| <i>Liberia</i>       | Western   | 2013                     | A                           | LIC                  | 57               | 762              | 1,002,431                              | 1.2                         | 2004                                          | Not having anaemia                                                                         |
| <i>Malawi</i>        | Eastern   | 2010                     | A                           | LIC                  | 58               | 629              | 3,297,665                              | 11.7                        | 1993                                          | Postnatal checkup                                                                          |
| <i>Mali</i>          | Western   | 2012-2013                | F                           | LIC                  | 79               | 617              | 3,517,972                              | 1.4                         | 2003                                          | Newborn checkup within two months after delivery, occupation                               |
| <i>Mozambique</i>    | Eastern   | 2011                     | -                           | LIC                  | 68               | 596              | 5,735,866                              | 11                          | 2006                                          | -                                                                                          |
| <i>Namibia</i>       | Southern  | 2013                     | A                           | UMIC                 | 34               | 283              | 624,523                                | 16.2                        | 2005                                          | -                                                                                          |
| <i>Niger</i>         | Western   | 2012                     | F                           | LIC                  | 62               | 619              | 3,636,832                              | 0.6                         | 2005                                          | Religion                                                                                   |
| <i>Nigeria</i>       | Western   | 2013                     | A                           | LMIC                 | 74               | 821              | 39,172,542                             | 3.3                         | 2004                                          | Not having anaemia                                                                         |

|                     |         |           |   |      |    |      |            |      |                   |                                                                                               |
|---------------------|---------|-----------|---|------|----|------|------------|------|-------------------|-----------------------------------------------------------------------------------------------|
| <i>Rwanda</i>       | Eastern | 2014-2015 | F | LIC  | 33 | 304  | 2,905,877  | 2.8  | 2005 – until 2008 | Malaria prophylaxis during pregnancy                                                          |
| <i>Senegal</i>      | Western | 2014      | F | LMIC | 42 | 323  | 3,546,400  | 0.5  | 2004              | Not having anaemia, having the recommended BMI, HIV test offered during pregnancy, occupation |
| <i>Sierra Leone</i> | Western | 2013      | A | LIC  | 94 | 1460 | 1,492,597  | 1.5  | 2004              | -                                                                                             |
| <i>Tanzania</i>     | Eastern | 2010      | A | LIC  | 42 | 514  | 10,532,046 | 6.1  | 2001              | Postnatal checkup, religion                                                                   |
| <i>Togo</i>         | Western | 2013-2014 | F | LIC  | 55 | 386  | 1,689,457  | 2.5  | 2003              | -                                                                                             |
| <i>Uganda</i>       | Eastern | 2011      | A | LIC  | 46 | 408  | 7,460,696  | 7.1  | 2000              | -                                                                                             |
| <i>Zambia</i>       | Eastern | 2013-2014 | A | LMIC | 47 | 237  | 3,476,200  | 12.6 | 2001              | Not having anaemia                                                                            |
| <i>Zimbabwe</i>     | Eastern | 2010-2011 | A | LIC  | 56 | 446  | 3,551,962  | 18   | 2004              | -                                                                                             |

**Note:** all country data belong to the year of the particular survey. UN=United Nations, A/F=Anglophone/Francophone, IMR=Infant Mortality Rate, MMR=Maternal Mortality Ratio, HIV=Human Immunodeficiency Virus, IPTp=Intermittent Preventive Treatment of malaria in pregnancy, DHS=Demographic Health Surveys, Congo=Congo Republic, Congo DR= Democratic Republic of Congo.

### **References**

1. USAID. The DHS Program. Available: <http://www.dhsprogram.com>. Accessed: 28 March 2018.
2. The World Bank Group. World Development Indicators. Washington DC: World Bank Group, 2018. Available: <http://data.worldbank.org/data-catalog/world-development-indicators>. Accessed: 28 March 2018.
3. Van Eijk. A. M. et al. Coverage of malaria protection in pregnant women in sub-Saharan Africa: A synthesis and analysis of national survey data. *Lancet Infect. Dis.* 2011;11:190–207.

**Table S2. Average HOIs, D-indexes and coverage rates by opportunity**

| <b>Opportunities</b>                                                         | <b>Average HOI (CI)</b> | <b>Average D-index (CI)</b> | <b>Average Coverage rate (CI)</b> |
|------------------------------------------------------------------------------|-------------------------|-----------------------------|-----------------------------------|
| <i>Not having anaemia</i>                                                    | 45,47 (35,32-55,63)     | 3,4 (2,45-4,35)             | 47,36 (36,91-57,80)               |
| <i>Having the recommended BMI</i>                                            | 58,76 (53,44-64,07)     | 7,4 (6,10-8,70)             | 63,43 (58,08-68,79)               |
| <i>Met need for family planning</i>                                          | 46,26 (39,89-52,64)     | 14,09 (11,40-16,79)         | 52,82 (46,94-58,70)               |
| <i>Knowledge of a place where to get an HIV test</i>                         | 66,48 (57,61-75,35)     | 9,36 (6,61-12,11)           | 71,84 (63,79-79,90)               |
| <i>Four antenatal care visits attended by skilled personnel</i>              | 46,2 (38,07-54,32)      | 12,93 (9,48-16,38)          | 51,57 (43,62-59,53)               |
| <i>Delivery attended by skilled personnel</i>                                | 53,1 (44,43-61,76)      | 16,85 (12,20-21,51)         | 61,18 (53,11-69,26)               |
| <i>Mother's checkup after delivery</i>                                       | 52,77 (43,24-62,30)     | 10,27 (6,90-13,65)          | 57,85 (48,21-67,49)               |
| <i>Maternity care package</i>                                                | 26,08 (19,28-32,88)     | 24,64 (19,32-29,96)         | 32,4 (25,11-39,69)                |
| <i>Malaria prophylaxis during pregnancy (At least one dose of IPTp (SP))</i> | 47,45 (36,27-58,63)     | 7,47 (4,04-10,91)           | 49,74 (38,47-61,00)               |
| <i>HIV test offered during pregnancy</i>                                     | 61,26 (50,74-71,79)     | 9,79 (6,27-13,32)           | 66,19 (56,21-76,17)               |
| <i>Infant checkup within two months after delivery</i>                       | 45,51 (36,52-54,50)     | 8,58 (5,98-11,18)           | 48,78 (39,66-57,91)               |
| <i>Exclusive breastfeeding among children aged 0-6 months</i>                | 76,67 (72,26-81,08)     | 4,54 (3,77-5,31)            | 80,14 (76,03-84,25)               |
| <i>Met need for family planning (older adolescent girls)</i>                 | 37,82 (32,66-42,98)     | 19,23 (16,36-22,10)         | 45,99 (40,93-51,05)               |
| <i>Having never been pregnant (older adolescent girls)</i>                   | 65,27 (60,88-69,65)     | 15,18 (12,94-17,41)         | 76,43 (73,08-79,78)               |
| <i>Currently attending school (older adolescent girls)</i>                   | 39,46 (33,55-45,36)     | 26,38 (22,06-30,70)         | 51,57 (45,90-57,24)               |

**Note:** D-index=Dissimilarity Index, BMI=Body Mass Index, HIV= Human Immunodeficiency Virus, HOI=Human Opportunity Index

**Figure S1. Older adolescents' opportunities by marital status: HOI and D-index by opportunity.**

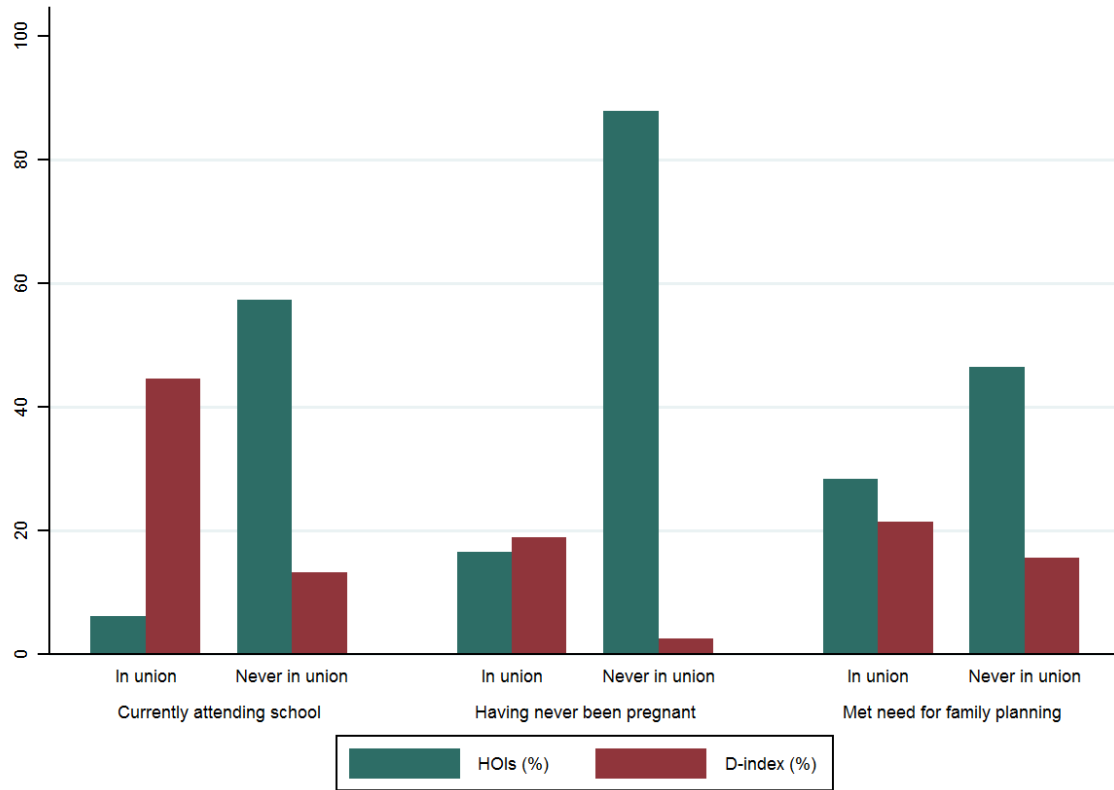

**Note:** HOI=Human Opportunity Index, D-index=Dissimilarity Index
